# Supplementary material for: Automatic diagnosis of neurological diseases using MEG signals with a deep neural network
Source: PubMed Central journal article supplement (PMC6433906; doi:10.1038/s41598-019-41500-x), 2019-03-25
Supplement: 41598_2019_41500_MOESM1_ESM.pdf [file 41598_2019_41500_MOESM1_ESM.pdf]

# Supplementary Information

## **Automatic diagnosis of neurological diseases using MEG signals with a deep neural network**

Jo Aoe<sup>1†</sup>, Ryohei Fukuma<sup>2†</sup>, Takufumi Yanagisawa<sup>1,2,3\*</sup>, Tatsuya Harada<sup>4\*</sup>, Masataka Tanaka<sup>2</sup>, Maki Kobayashi<sup>2</sup>, You Inoue<sup>2</sup>, Shota Yamamoto<sup>2</sup>, Yuichiro Ohnishi<sup>2</sup>, Haruhiko Kishima<sup>2</sup>

<sup>1</sup>Osaka University Institute for Advanced Co-Creation Studies, Suita, Japan

<sup>2</sup>Department of Neurosurgery, Osaka University Graduate School of Medicine, Suita, Japan

<sup>3</sup>JST PRESTO, Suita, Japan

<sup>4</sup>Department of Mechano-Informatics, Graduate School of Information Science and Technology, The University of Tokyo

<sup>†</sup>These authors contributed equally to this work.

### **\* Correspondence:**

Takufumi Yanagisawa, M.D., Ph.D., [tyanagisawa@nsurg.med.osaka-u.ac.jp](mailto:tyanagisawa@nsurg.med.osaka-u.ac.jp)

Tatsuya Harada, Ph.D., [harada@mi.t.u-tokyo.ac.jp](mailto:harada@mi.t.u-tokyo.ac.jp)

**Supplementary Table S1.**

Confusion matrix of the classification of healthy subjects, patients with epilepsy, and patients with spinal cord injury.

|          |     | Predicted |     |     |
|----------|-----|-----------|-----|-----|
|          |     | HS        | EP  | SCI |
| Original | HS  | 53        | 10  | 4   |
|          | EP  | 9         | 123 | 8   |
|          | SCI | 11        | 3   | 12  |

HS: healthy subjects; EP: patients with epilepsy; SCI: patients with spinal cord injury

**Supplementary Table S2.**

Confusion matrix of the classification of healthy subjects and patients with epilepsy.

|          |    | Predicted |     |
|----------|----|-----------|-----|
|          |    | HS        | EP  |
| Original | HS | 58        | 9   |
|          | EP | 13        | 127 |

HS: healthy subjects; EP: patients with epilepsy

**Supplementary Table S3.**

Confusion matrix of the classification of healthy subjects and patients with spinal cord injury.

|          |     | Predicted |     |
|----------|-----|-----------|-----|
|          |     | HS        | SCI |
| Original | HS  | 55        | 12  |
|          | SCI | 16        | 10  |

HS: healthy subjects; SCI: patients with spinal cord injury

**Supplementary Table S4.**

Confusion matrix of the classification of patients with epilepsy and patients with spinal cord injury.

|          |     | Predicted |     |
|----------|-----|-----------|-----|
|          |     | EP        | SCI |
| Original | EP  | 137       | 3   |
|          | SCI | 10        | 16  |

EP: Patients with epilepsy; SCI: patients with spinal cord injury

**Supplementary Table S5.**

Confusion matrix of the classification of healthy subjects and patients with epilepsy by three-fold nested cross-validation.

|          |    | Predicted |     |
|----------|----|-----------|-----|
|          |    | HS        | EP  |
| Original | HS | 50        | 17  |
|          | EP | 13        | 127 |

HS: healthy subjects; EP: patients with epilepsy

### Supplementary Figure S6.

ROC curve of the classification of healthy subjects and patients with epilepsy; in this figure, positive means having epilepsy

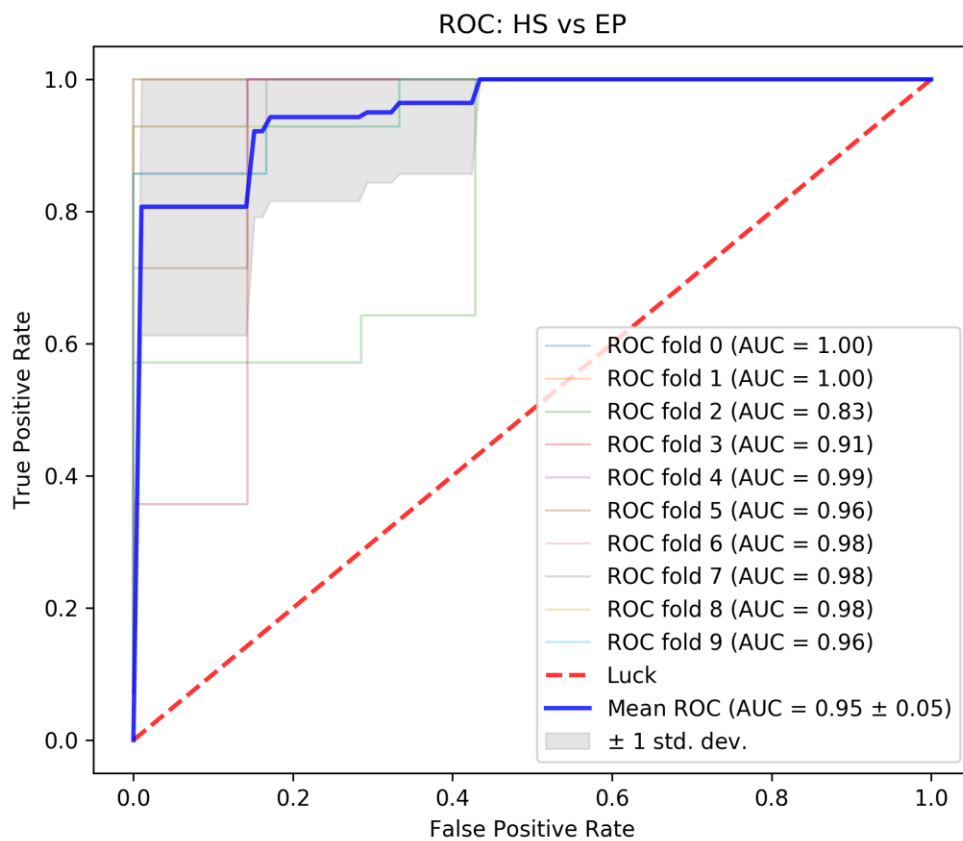

AUC: area under the curve; HS: healthy subjects; EP: patients with epilepsy

### Supplementary Figure S7.

ROC curve of the classification of healthy subjects and patients with spinal cord injury; in this figure, positive means having spinal cord injury.

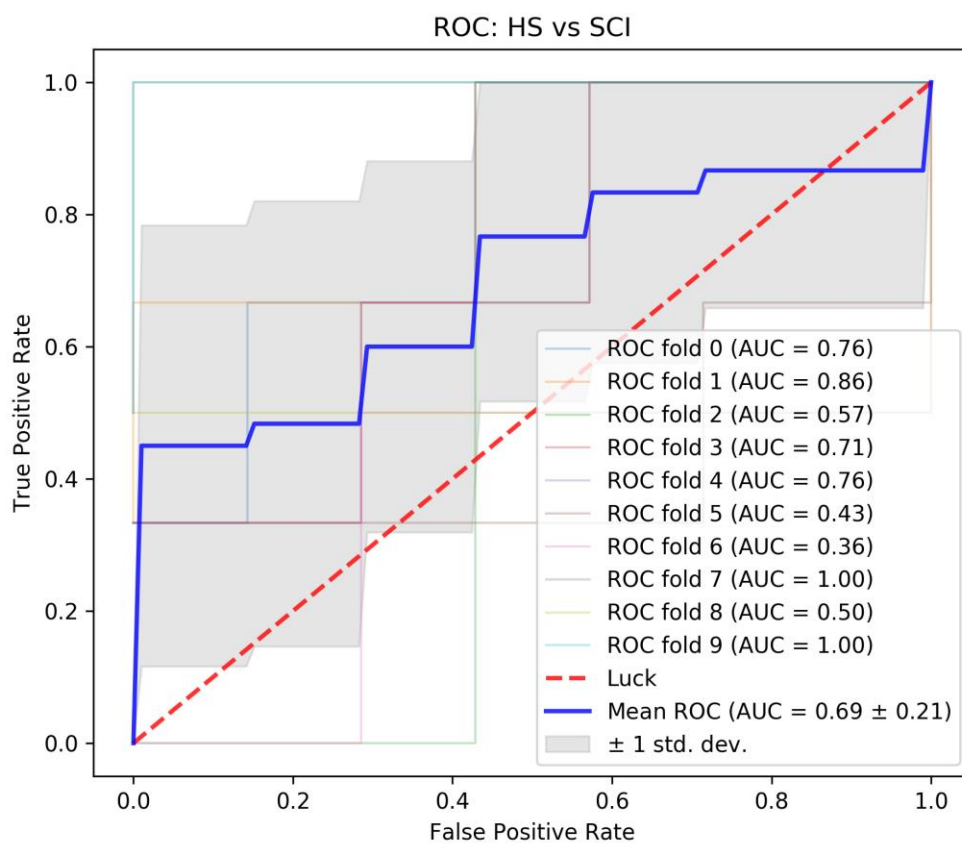

AUC: area under the curve; HS: healthy subjects; SCI: patients with spinal cord injury

### Supplementary Figure S8.

ROC curve of the classification of patients with epilepsy and patients with spinal cord injury; in this figure, positive means having spinal cord injury.

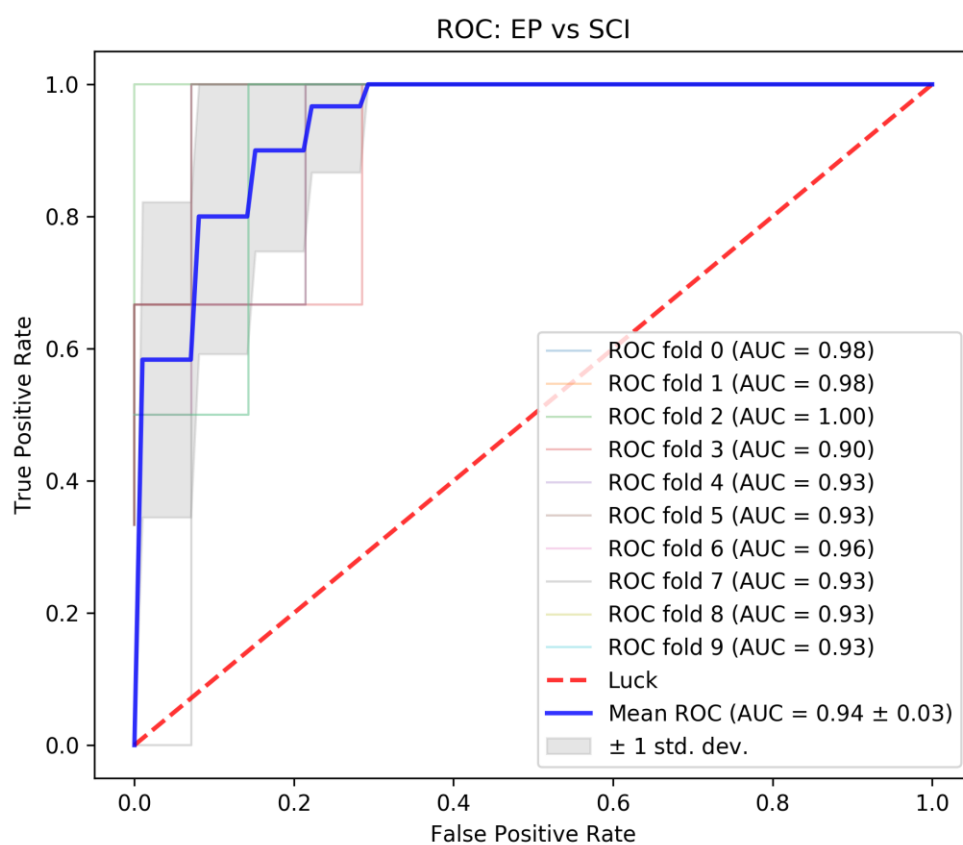

AUC: area under the curve; EP: patients with epilepsy; SCI: patients with spinal cord

injury

### Supplementary Figure S9.

ROC curve of the classification of patients with epilepsy and healthy subjects with three-fold nested cross-validation; in this figure, positive means having epilepsy.

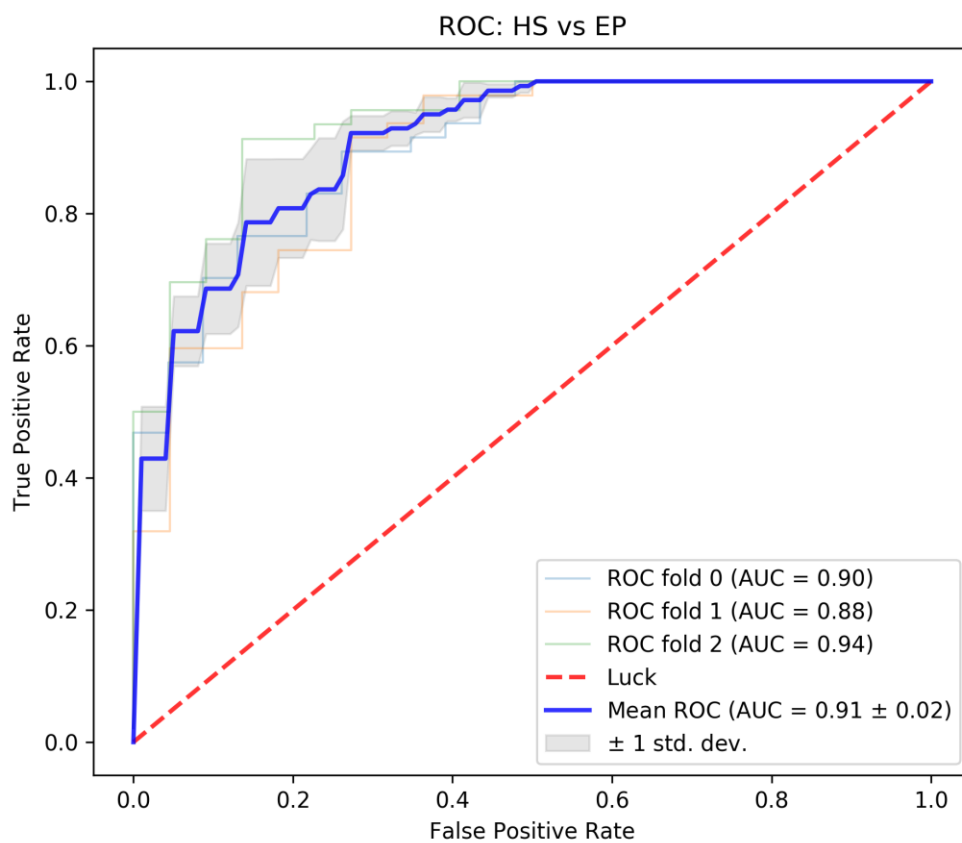

AUC: area under the curve; EP: patients with epilepsy; HS: healthy subjects

**Supplementary Figure S10.** Box and whisker plots of age distribution of healthy subjects, patients with spinal cord injury, and patients with epilepsy. The box extends from the lower to upper quartile values of the data, with a line at the median. The whiskers extend from the box to show the range of the data. Outliers are represented as circles.

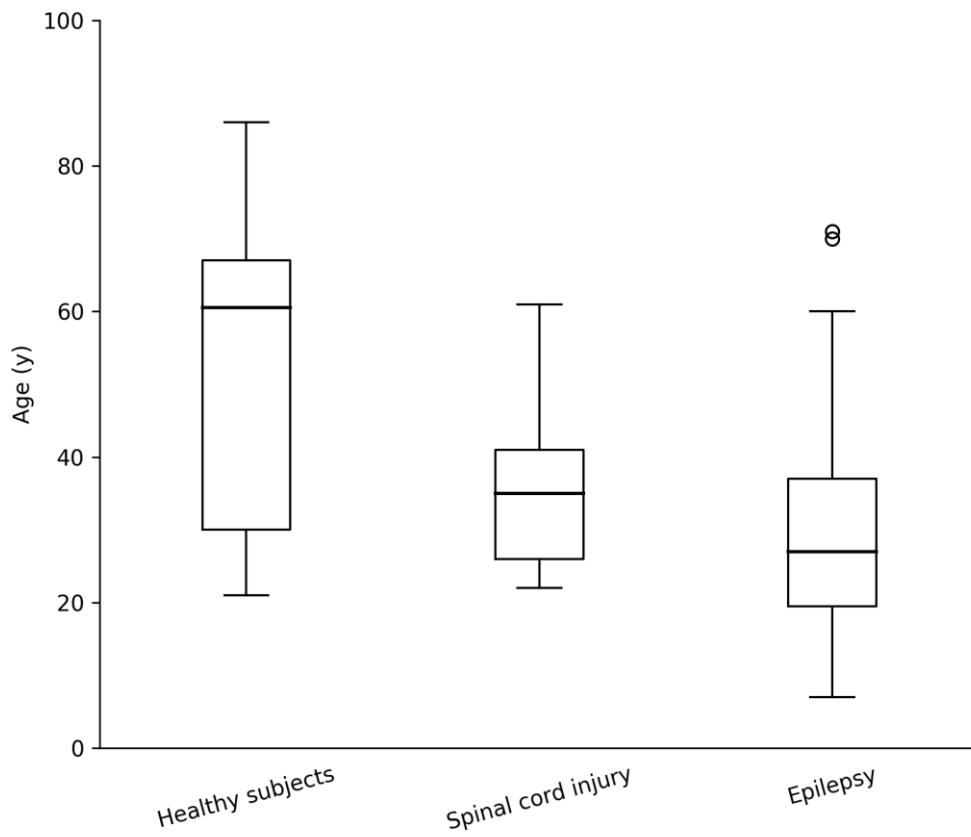



**Supplementary Table S11.** Records information of data used in the study. Subject ID numbers subjects individually. The high-pass and low-pass filter columns show the cut-off frequencies of the high- and low-pass filters, respectively, and the band elimination filter column shows the frequency of the band elimination filter.

| Subject ID | Diagnosis       | Age (y) | Gender | Sampling Rate (Hz) | Acquisition Time (s) | High pass filter (Hz) | Low pass filter (Hz) | band elimination filter (Hz) | Subtypes of epilepsy |
|------------|-----------------|---------|--------|--------------------|----------------------|-----------------------|----------------------|------------------------------|----------------------|
| 1          | Healthy subject | 67      | Male   | 2k                 | 300                  | 0.1                   | 500                  | N/A                          |                      |
| 2          | Healthy subject | 62      | Female | 2k                 | 300                  | 0.1                   | 500                  | N/A                          |                      |
| 3          | Healthy subject | 72      | Male   | 2k                 | 300                  | 0.1                   | 500                  | N/A                          |                      |
| 4          | Healthy subject | 66      | Female | 2k                 | 300                  | 0.1                   | 500                  | N/A                          |                      |
| 5          | Healthy subject | 67      | Male   | 2k                 | 300                  | 0.1                   | 500                  | N/A                          |                      |
| 6          | Healthy subject | 68      | Male   | 2k                 | 300                  | 0.1                   | 500                  | N/A                          |                      |
| 7          | Healthy subject | 66      | Male   | 2k                 | 300                  | 0.1                   | 500                  | N/A                          |                      |
| 8          | Healthy subject | 69      | Male   | 2k                 | 300                  | 0.1                   | 500                  | N/A                          |                      |
| 9          | Healthy subject | 60      | Female | 2k                 | 300                  | 0.1                   | 500                  | N/A                          |                      |
| 10         | Healthy subject | 65      | Male   | 2k                 | 300                  | 0.1                   | 500                  | N/A                          |                      |
| 11         | Healthy subject | 70      | Male   | 2k                 | 300                  | 0.1                   | 500                  | N/A                          |                      |
| 12         | Healthy subject | 55      | Male   | 2k                 | 300                  | 0.1                   | 500                  | N/A                          |                      |
| 13         | Healthy subject | 56      | Female | 2k                 | 300                  | 0.1                   | 500                  | N/A                          |                      |
| 14         | Healthy subject | 69      | Female | 2k                 | 300                  | 0.1                   | 500                  | N/A                          |                      |
| 15         | Healthy subject | 72      | Male   | 2k                 | 300                  | 0.1                   | 500                  | N/A                          |                      |
| 16         | Healthy subject | 67      | Male   | 2k                 | 300                  | 0.1                   | 500                  | N/A                          |                      |
| 17         | Healthy subject | 69      | Male   | 2k                 | 300                  | 0.1                   | 500                  | N/A                          |                      |
| 18         | Healthy subject | 57      | Female | 2k                 | 300                  | 0.1                   | 500                  | N/A                          |                      |
| 19         | Healthy subject | 64      | Female | 2k                 | 300                  | 0.1                   | 500                  | N/A                          |                      |
| 20         | Healthy subject | 74      | Female | 2k                 | 240                  | 0.1                   | 500                  | N/A                          |                      |
| 21         | Healthy subject | 76      | Male   | 2k                 | 240                  | 0.1                   | 500                  | N/A                          |                      |
| 22         | Healthy subject | 71      | Male   | 2k                 | 240                  | 0.1                   | 500                  | N/A                          |                      |
| 23         | Healthy subject | 55      | Female | 2k                 | 240                  | 0.1                   | 500                  | N/A                          |                      |
| 24         | Healthy subject | 63      | Female | 2k                 | 240                  | 0.1                   | 500                  | N/A                          |                      |

|    |                 |    |        |    |     |     |     |     |  |
|----|-----------------|----|--------|----|-----|-----|-----|-----|--|
| 25 | Healthy subject | 57 | Female | 2k | 240 | 0.1 | 500 | N/A |  |
| 26 | Healthy subject | 57 | Female | 2k | 240 | 0.1 | 500 | N/A |  |
| 27 | Healthy subject | 30 | Male   | 2k | 240 | 0.1 | 500 | N/A |  |
| 28 | Healthy subject | 33 | Male   | 1k | 300 | N/A | 200 | 60  |  |
| 29 | Healthy subject | 34 | Female | 1k | 300 | N/A | 200 | 60  |  |
| 30 | Healthy subject | 65 | Male   | 2k | 240 | 0.1 | 500 | N/A |  |
| 31 | Healthy subject | 63 | Female | 2k | 240 | 0.1 | 500 | 60  |  |
| 32 | Healthy subject | 64 | Female | 2k | 240 | 0.1 | 500 | 60  |  |
| 33 | Healthy subject | 61 | Male   | 2k | 240 | 0.1 | 500 | 60  |  |
| 34 | Healthy subject | 63 | Male   | 2k | 240 | 0.1 | 500 | 60  |  |
| 35 | Healthy subject | 65 | Female | 2k | 240 | 0.1 | 500 | 60  |  |
| 36 | Healthy subject | 62 | Female | 2k | 240 | 0.1 | 500 | 60  |  |
| 37 | Healthy subject | 59 | Male   | 2k | 240 | 0.1 | 500 | 60  |  |
| 38 | Healthy subject | 66 | Male   | 2k | 240 | 0.1 | 500 | 60  |  |
| 39 | Healthy subject | 56 | Male   | 2k | 240 | 0.1 | 500 | 60  |  |
| 40 | Healthy subject | 66 | Male   | 2k | 240 | 0.1 | 500 | 60  |  |
| 41 | Healthy subject | 59 | Male   | 2k | 240 | 0.1 | 500 | 60  |  |
| 42 | Healthy subject | 69 | Male   | 2k | 240 | 0.1 | 500 | 60  |  |
| 43 | Healthy subject | 68 | Female | 2k | 240 | 0.1 | 500 | 60  |  |
| 44 | Healthy subject | 84 | Female | 2k | 240 | 0.1 | 500 | 60  |  |
| 45 | Healthy subject | 40 | Male   | 2k | 240 | 0.1 | 500 | 60  |  |
| 46 | Healthy subject | 58 | Female | 2k | 240 | 0.1 | 500 | 60  |  |
| 47 | Healthy subject | 86 | Male   | 2k | 240 | 0.1 | 500 | 60  |  |
| 48 | Healthy subject | 80 | Male   | 2k | 240 | 0.1 | 500 | 60  |  |
| 49 | Healthy subject | 21 | Female | 1k | 300 | 0.1 | 200 | 60  |  |
| 50 | Healthy subject | 21 | Female | 2k | 240 | 0.1 | 500 | 60  |  |
| 51 | Healthy subject | 23 | Female | 2k | 240 | 0.1 | 500 | 60  |  |
| 52 | Healthy subject | 22 | Female | 1k | 300 | N/A | 200 | 60  |  |
| 53 | Healthy subject | 24 | Female | 2k | 240 | 0.1 | 500 | 60  |  |
| 54 | Healthy subject | 23 | Male   | 2k | 240 | 0.1 | 500 | 60  |  |
| 55 | Healthy subject | 22 | Female | 2k | 240 | 0.1 | 500 | 60  |  |
| 56 | Healthy subject | 22 | Female | 2k | 240 | 0.1 | 500 | 60  |  |

|    |                    |    |        |    |     |     |     |    |  |
|----|--------------------|----|--------|----|-----|-----|-----|----|--|
| 57 | Healthy subject    | 21 | Female | 2k | 240 | 0.1 | 500 | 60 |  |
| 58 | Healthy subject    | 29 | Male   | 1k | 300 | N/A | 200 | 60 |  |
| 59 | Healthy subject    | 22 | Female | 1k | 300 | N/A | 200 | 60 |  |
| 60 | Healthy subject    | 25 | Female | 1k | 300 | N/A | 200 | 60 |  |
| 61 | Healthy subject    | 24 | Female | 1k | 300 | N/A | 200 | 60 |  |
| 62 | Healthy subject    | 37 | Male   | 1k | 300 | N/A | 200 | 60 |  |
| 63 | Healthy subject    | 30 | Male   | 1k | 300 | N/A | 200 | 60 |  |
| 64 | Healthy subject    | 25 | Female | 1k | 300 | N/A | 200 | 60 |  |
| 65 | Healthy subject    | 22 | Female | 1k | 300 | N/A | 200 | 60 |  |
| 66 | Healthy subject    | 22 | Female | 1k | 300 | N/A | 200 | 60 |  |
| 67 | Healthy subject    | 22 | Female | 1k | 300 | N/A | 200 | 60 |  |
| 68 | Spinal cord injury | 38 | Male   | 1k | 300 | N/A | 200 | 60 |  |
| 69 | Spinal cord injury | 28 | Male   | 1k | 300 | N/A | 200 | 60 |  |
| 70 | Spinal cord injury | 35 | Male   | 1k | 300 | N/A | 200 | 60 |  |
| 71 | Spinal cord injury | 33 | Male   | 1k | 300 | N/A | 200 | 60 |  |
| 72 | Spinal cord injury | 25 | Male   | 1k | 300 | N/A | 200 | 60 |  |
| 73 | Spinal cord injury | 41 | Female | 1k | 300 | N/A | 200 | 60 |  |
| 74 | Spinal cord injury | 22 | Male   | 2k | 240 | 0.1 | 500 | 60 |  |
| 75 | Spinal cord injury | 61 | Male   | 2k | 240 | 0.1 | 500 | 60 |  |
| 76 | Spinal cord injury | 61 | Male   | 2k | 240 | 0.1 | 500 | 60 |  |
| 77 | Spinal cord injury | 23 | Male   | 2k | 240 | 0.1 | 500 | 60 |  |
| 78 | Spinal cord injury | 22 | Male   | 2k | 240 | 0.1 | 500 | 60 |  |
| 79 | Spinal cord injury | 48 | Male   | 2k | 240 | 0.1 | 500 | 60 |  |
| 80 | Spinal cord injury | 32 | Male   | 1k | 300 | N/A | 200 | 60 |  |
| 81 | Spinal cord injury | 46 | Male   | 2k | 240 | 0.1 | 500 | 60 |  |
| 82 | Spinal cord injury | 43 | Male   | 2k | 240 | 0.1 | 500 | 60 |  |
| 83 | Spinal cord injury | 23 | Female | 2k | 240 | 0.1 | 500 | 60 |  |
| 84 | Spinal cord injury | 34 | Male   | 2k | 240 | 0.1 | 500 | 60 |  |
| 85 | Spinal cord injury | 40 | Male   | 1k | 300 | N/A | 200 | 60 |  |
| 86 | Spinal cord injury | 22 | Male   | 1k | 300 | N/A | 200 | 60 |  |
| 87 | Spinal cord injury | 36 | Male   | 1k | 300 | N/A | 200 | 60 |  |
| 88 | Spinal cord injury | 39 | Female | 1k | 300 | N/A | 200 | 60 |  |

|     |                    |    |        |    |     |     |     |    |                     |
|-----|--------------------|----|--------|----|-----|-----|-----|----|---------------------|
| 89  | Spinal cord injury | 39 | Male   | 1k | 240 | 0.1 | 200 | 60 |                     |
| 90  | Spinal cord injury | 45 | Male   | 1k | 240 | 0.1 | 200 | 60 |                     |
| 91  | Spinal cord injury | 29 | Male   | 1k | 300 | N/A | 200 | 60 |                     |
| 92  | Spinal cord injury | 26 | Male   | 1k | 300 | N/A | 200 | 60 |                     |
| 93  | Spinal cord injury | 22 | Male   | 2k | 240 | 0.1 | 500 | 60 |                     |
| 94  | Epilepsy           | 27 | Male   | 2k | 240 | 0.1 | 500 | 60 | Right TLE           |
| 95  | Epilepsy           | 18 | Female | 1k | 240 | 0.1 | 200 | 60 | TLE                 |
| 96  | Epilepsy           | 49 | Male   | 2k | 240 | 0.1 | 500 | 60 | Rt TLE              |
| 97  | Epilepsy           | 59 | Male   | 2k | 240 | 0.1 | 500 | 60 | Lt Frontal Epi      |
| 98  | Epilepsy           | 30 | Female | 1k | 240 | 0.1 | 200 | 60 | Lt TLE              |
| 99  | Epilepsy           | 22 | Female | 2k | 240 | 0.1 | 500 | 60 | Lt TLE susp         |
| 100 | Epilepsy           | 34 | Female | 2k | 240 | 0.1 | 500 | 60 | Lt TLE              |
| 101 | Epilepsy           | 17 | Male   | 2k | 240 | 0.1 | 500 | 60 | JME                 |
| 102 | Epilepsy           | 45 | Male   | 2k | 240 | 0.1 | 500 | 60 | Left SMA Epi        |
| 103 | Epilepsy           | 19 | Female | 2k | 240 | 0.1 | 500 | 60 | Frontal epilepsy    |
| 104 | Epilepsy           | 21 | Male   | 2k | 240 | 0.1 | 500 | 60 | bil. TLE            |
| 105 | Epilepsy           | 19 | Male   | 2k | 240 | 0.1 | 500 | 60 | Rt TLE              |
| 106 | Epilepsy           | 32 | Female | 2k | 240 | 0.1 | 500 | 60 | Rt motor FCD        |
| 107 | Epilepsy           | 21 | Male   | 2k | 240 | 0.1 | 500 | 60 | Rt TLE              |
| 108 | Epilepsy           | 26 | Male   | 2k | 240 | 0.1 | 500 | 60 | Rt MTLE             |
| 109 | Epilepsy           | 58 | Male   | 2k | 240 | 0.1 | 500 | 60 | Lt Occipital        |
| 110 | Epilepsy           | 40 | Female | 2k | 240 | 0.1 | 500 | 60 | Rt TLE              |
| 111 | Epilepsy           | 33 | Female | 2k | 240 | 0.1 | 500 | 60 | bil TLE             |
| 112 | Epilepsy           | 25 | Male   | 2k | 240 | 0.1 | 500 | 60 | Intractable Epi     |
| 113 | Epilepsy           | 17 | Male   | 2k | 240 | 0.1 | 500 | 60 | Rt Frontal          |
| 114 | Epilepsy           | 20 | Male   | 2k | 240 | 0.1 | 500 | 60 | Lt TLE              |
| 115 | Epilepsy           | 21 | Female | 2k | 240 | 0.1 | 500 | 60 | Idiopathic epilepsy |
| 116 | Epilepsy           | 21 | Male   | 2k | 240 | 0.1 | 500 | 60 | Lt TLE susp         |
| 117 | Epilepsy           | 17 | Female | 2k | 240 | 0.1 | 500 | 60 | Lt Front FCD        |
| 118 | Epilepsy           | 26 | Female | 2k | 240 | 0.1 | 500 | 60 | Lt Occipital        |
| 119 | Epilepsy           | 20 | Female | 2k | 240 | 0.1 | 500 | 60 | Rt Occip FCD        |
| 120 | Epilepsy           | 16 | Male   | 2k | 240 | 0.1 | 500 | 60 | Rt Occip Tumor      |

|     |          |    |        |    |     |     |     |    |                                           |
|-----|----------|----|--------|----|-----|-----|-----|----|-------------------------------------------|
| 121 | Epilepsy | 56 | Female | 2k | 240 | 0.1 | 500 | 60 | Trauma Rt Par                             |
| 122 | Epilepsy | 52 | Female | 2k | 240 | 0.1 | 500 | 60 | LT TLE                                    |
| 123 | Epilepsy | 23 | Female | 2k | 240 | 0.1 | 500 | 60 | JME                                       |
| 124 | Epilepsy | 28 | Male   | 2k | 240 | 0.1 | 500 | 60 | Rt Frontal FCD                            |
| 125 | Epilepsy | 33 | Female | 2k | 240 | 0.1 | 500 | 60 | Symptomatic localization related epilepsy |
| 126 | Epilepsy | 24 | Male   | 2k | 240 | 0.1 | 500 | 60 | Rt TLE                                    |
| 127 | Epilepsy | 21 | Male   | 2k | 240 | 0.1 | 500 | 60 | Rt Temp DNT                               |
| 128 | Epilepsy | 27 | Male   | 2k | 240 | 0.1 | 500 | 60 | Idiopathic epilepsy                       |
| 129 | Epilepsy | 19 | Male   | 2k | 240 | 0.1 | 500 | 60 | Lt TLE                                    |
| 130 | Epilepsy | 60 | Female | 2k | 240 | 0.1 | 500 | 60 | Rt TLE susp                               |
| 131 | Epilepsy | 43 | Female | 2k | 240 | 0.1 | 500 | 60 | Lt TLE susp                               |
| 132 | Epilepsy | 7  | Male   | 2k | 240 | 0.1 | 500 | 60 | Lt TLE                                    |
| 133 | Epilepsy | 50 | Female | 2k | 240 | 0.1 | 500 | 60 | Lt TLE                                    |
| 134 | Epilepsy | 22 | Male   | 2k | 240 | 0.1 | 500 | 60 | Rt TLE                                    |
| 135 | Epilepsy | 30 | Male   | 2k | 240 | 0.1 | 500 | 60 | Rt Frontal                                |
| 136 | Epilepsy | 45 | Male   | 2k | 240 | 0.1 | 500 | 60 | bil Parietal FCD                          |
| 137 | Epilepsy | 22 | Male   | 2k | 240 | 0.1 | 500 | 60 | Frontal lobe epilepsy after encephalitis  |
| 138 | Epilepsy | 29 | Female | 2k | 240 | 0.1 | 500 | 60 | Idiopathic generalized epilepsy           |
| 139 | Epilepsy | 22 | Male   | 2k | 240 | 0.1 | 500 | 60 | Rt Front Parietal                         |
| 140 | Epilepsy | 29 | Female | 2k | 240 | 0.1 | 500 | 60 | Idiopathic generalized epilepsy           |
| 141 | Epilepsy | 53 | Female | 2k | 240 | 0.1 | 500 | 60 | Trauma TLE                                |
| 142 | Epilepsy | 12 | Male   | 2k | 240 | 0.1 | 500 | 60 | Lt TLE                                    |
| 143 | Epilepsy | 35 | Female | 2k | 240 | 0.1 | 500 | 60 | after right old infarction                |
| 144 | Epilepsy | 13 | Female | 2k | 240 | 0.1 | 500 | 60 | Lt TLE                                    |
| 145 | Epilepsy | 21 | Female | 2k | 240 | 0.1 | 500 | 60 | Rt TLE susp                               |
| 146 | Epilepsy | 37 | Male   | 2k | 240 | 0.1 | 500 | 60 | Lt TLE                                    |
| 147 | Epilepsy | 40 | Female | 2k | 240 | 0.1 | 500 | 60 | Bil TLE                                   |
| 148 | Epilepsy | 22 | Male   | 2k | 240 | 0.1 | 500 | 60 | Rt TLE                                    |

|     |          |    |        |    |     |     |     |    |                             |
|-----|----------|----|--------|----|-----|-----|-----|----|-----------------------------|
| 149 | Epilepsy | 20 | Female | 2k | 240 | 0.1 | 500 | 60 | Lt TLE susp                 |
| 150 | Epilepsy | 15 | Female | 2k | 240 | 0.1 | 500 | 60 | Lt TLE susp                 |
| 151 | Epilepsy | 21 | Male   | 2k | 240 | 0.1 | 500 | 60 | epilepsy after encephalitis |
| 152 | Epilepsy | 35 | Male   | 2k | 240 | 0.1 | 500 | 60 | Lt TLE susp                 |
| 153 | Epilepsy | 43 | Male   | 2k | 240 | 0.1 | 500 | 60 | Related to Rt localization  |
| 154 | Epilepsy | 32 | Female | 2k | 240 | 0.1 | 500 | 60 | epilepsy after encephalitis |
| 155 | Epilepsy | 35 | Female | 2k | 240 | 0.1 | 500 | 60 | Bil TLE                     |
| 156 | Epilepsy | 52 | Female | 2k | 240 | 0.1 | 500 | 60 | Lt TLE                      |
| 157 | Epilepsy | 25 | Male   | 2k | 240 | 0.1 | 500 | 60 | Lt PCC-Hip FCD              |
| 158 | Epilepsy | 23 | Female | 2k | 240 | 0.1 | 500 | 60 | Bil Front                   |
| 159 | Epilepsy | 43 | Male   | 2k | 240 | 0.1 | 500 | 60 | Left Medial TLE             |
| 160 | Epilepsy | 32 | Male   | 2k | 240 | 0.1 | 500 | 60 | Left Lateral TLE            |
| 161 | Epilepsy | 31 | Female | 2k | 240 | 0.1 | 500 | 60 | Medial+Lateral Right TLE    |
| 162 | Epilepsy | 19 | Male   | 1k | 240 | 0.1 | 200 | 60 | Left Lateral TLE            |
| 163 | Epilepsy | 43 | Female | 2k | 240 | 0.1 | 500 | 60 | Right Medial TLE            |
| 164 | Epilepsy | 45 | Female | 1k | 300 | N/A | 200 | 60 | Left Medial TLE             |
| 165 | Epilepsy | 12 | Male   | 1k | 300 | N/A | 200 | 60 | Left Medial TLE             |
| 166 | Epilepsy | 17 | Male   | 1k | 240 | 0.1 | 200 | 60 | Left Medial TLE             |
| 167 | Epilepsy | 37 | Male   | 1k | 240 | 0.1 | 200 | 60 | Left Medial TLE             |
| 168 | Epilepsy | 34 | Female | 1k | 240 | 0.1 | 200 | 60 | Left Medial TLE             |
| 169 | Epilepsy | 26 | Female | 1k | 240 | 0.1 | 200 | 60 | Left Medial TLE             |
| 170 | Epilepsy | 39 | Female | 2k | 240 | 0.1 | 500 | 60 | Left Medial TLE             |
| 171 | Epilepsy | 39 | Male   | 1k | 240 | 0.1 | 200 | 60 | Left Medial TLE             |
| 172 | Epilepsy | 21 | Male   | 2k | 240 | 0.1 | 500 | 60 | Left Medial TLE             |
| 173 | Epilepsy | 24 | Male   | 2k | 240 | 0.1 | 500 | 60 | Left Medial TLE             |
| 174 | Epilepsy | 30 | Female | 2k | 240 | 0.1 | 500 | 60 | Left Medial TLE             |
| 175 | Epilepsy | 22 | Female | 1k | 300 | N/A | 200 | 60 | Right Medial TLE            |
| 176 | Epilepsy | 33 | Female | 1k | 300 | N/A | 200 | 60 | Right Medial TLE            |
| 177 | Epilepsy | 19 | Female | 1k | 240 | 0.1 | 200 | 60 | Right Medial TLE            |
| 178 | Epilepsy | 19 | Female | 1k | 240 | 0.1 | 200 | 60 | Right Medial TLE            |
| 179 | Epilepsy | 30 | Male   | 1k | 240 | 0.1 | 200 | 60 | Right Medial TLE            |
| 180 | Epilepsy | 13 | Female | 1k | 240 | 0.1 | 200 | 60 | Right Medial TLE            |

|     |          |    |        |    |     |     |     |    |                          |
|-----|----------|----|--------|----|-----|-----|-----|----|--------------------------|
| 181 | Epilepsy | 21 | Male   | 1k | 240 | 0.1 | 200 | 60 | Right Medial TLE         |
| 182 | Epilepsy | 50 | Female | 1k | 240 | 0.1 | 200 | 60 | Right Medial TLE         |
| 183 | Epilepsy | 21 | Male   | 1k | 240 | 0.1 | 200 | 60 | Right Medial TLE         |
| 184 | Epilepsy | 70 | Female | 1k | 240 | 0.1 | 200 | 60 | Right Medial TLE         |
| 185 | Epilepsy | 42 | Female | 2k | 240 | 0.1 | 500 | 60 | Right Medial TLE         |
| 186 | Epilepsy | 40 | Female | 2k | 240 | 0.1 | 500 | 60 | Right Medial TLE         |
| 187 | Epilepsy | 15 | Female | 2k | 240 | 0.1 | 500 | 60 | Right Medial TLE         |
| 188 | Epilepsy | 19 | Male   | 2k | 240 | 0.1 | 500 | 60 | Right Medial TLE         |
| 189 | Epilepsy | 35 | Female | 2k | 240 | 0.1 | 500 | 60 | Right Medial TLE         |
| 190 | Epilepsy | 12 | Female | 2k | 240 | 0.1 | 500 | 60 | Right Medial TLE         |
| 191 | Epilepsy | 40 | Female | 2k | 240 | 0.1 | 500 | 60 | Right Medial TLE         |
| 192 | Epilepsy | 20 | Female | 1k | 240 | 0.1 | 200 | 60 | Bilateral Medial TLE     |
| 193 | Epilepsy | 16 | Female | 1k | 240 | 0.1 | 200 | 60 | Right Lateral TLE        |
| 194 | Epilepsy | 37 | Male   | 1k | 240 | 0.1 | 200 | 60 | Right Lateral TLE        |
| 195 | Epilepsy | 29 | Female | 1k | 300 | N/A | 200 | 60 | Left Lateral TLE         |
| 196 | Epilepsy | 15 | Male   | 1k | 240 | 0.1 | 200 | 60 | Left Lateral TLE         |
| 197 | Epilepsy | 40 | Male   | 2k | 240 | 0.1 | 500 | 60 | Left Lateral TLE         |
| 198 | Epilepsy | 35 | Male   | 2k | 240 | 0.1 | 500 | 60 | Left Lateral TLE         |
| 199 | Epilepsy | 56 | Male   | 1k | 240 | 0.1 | 200 | 60 | Bilateral Lateral TLE    |
| 200 | Epilepsy | 13 | Female | 1k | 240 | 0.1 | 200 | 60 | Medial+Lateral Left TLE  |
| 201 | Epilepsy | 27 | Female | 1k | 240 | 0.1 | 200 | 60 | Medial+Lateral Right TLE |
| 202 | Epilepsy | 31 | Female | 1k | 240 | 0.1 | 200 | 60 | Medial+Lateral Right TLE |
| 203 | Epilepsy | 35 | Female | 1k | 240 | 0.1 | 200 | 60 | Medial+Lateral Right TLE |
| 204 | Epilepsy | 27 | Female | 1k | 240 | 0.1 | 200 | 60 | Medial+Lateral Right TLE |
| 205 | Epilepsy | 45 | Male   | 1k | 240 | 0.1 | 200 | 60 | Medial+Lateral Right TLE |
| 206 | Epilepsy | 36 | Male   | 2k | 240 | 0.1 | 500 | 60 | Medial+Lateral Right TLE |
| 207 | Epilepsy | 71 | Female | 1k | 240 | 0.1 | 200 | 60 | non-TLE epilepsy         |
| 208 | Epilepsy | 14 | Female | 2k | 240 | 0.1 | 500 | 60 | non-TLE epilepsy         |
| 209 | Epilepsy | 34 | Male   | 2k | 240 | 0.1 | 500 | 60 | unclassifiable Left      |
| 210 | Epilepsy | 36 | Male   | 2k | 240 | 0.1 | 500 | 60 | unclassifiable Left      |
| 211 | Epilepsy | 22 | Male   | 2k | 240 | 0.1 | 500 | 60 | unclassifiable Left      |
| 212 | Epilepsy | 19 | Male   | 2k | 240 | 0.1 | 500 | 60 | unclassifiable Left      |

|     |          |    |        |    |     |     |     |    |                      |
|-----|----------|----|--------|----|-----|-----|-----|----|----------------------|
| 213 | Epilepsy | 38 | Male   | 2k | 240 | 0.1 | 500 | 60 | unclassifiable Left  |
| 214 | Epilepsy | 17 | Female | 1k | 240 | 0.1 | 200 | 60 | unclassifiable Left  |
| 215 | Epilepsy | 18 | Female | 2k | 240 | 0.1 | 500 | 60 | unclassifiable Left  |
| 216 | Epilepsy | 16 | Male   | 2k | 240 | 0.1 | 500 | 60 | unclassifiable Left  |
| 217 | Epilepsy | 46 | Male   | 2k | 240 | 0.1 | 500 | 60 | unclassifiable Left  |
| 218 | Epilepsy | 15 | Female | 2k | 240 | 0.1 | 500 | 60 | unclassifiable Left  |
| 219 | Epilepsy | 52 | Female | 2k | 240 | 0.1 | 500 | 60 | unclassifiable Left  |
| 220 | Epilepsy | 57 | Female | 1k | 240 | 0.1 | 200 | 60 | unclassifiable Right |
| 221 | Epilepsy | 34 | Female | 1k | 240 | 0.1 | 200 | 60 | unclassifiable Right |
| 222 | Epilepsy | 15 | Female | 1k | 240 | 0.1 | 200 | 60 | unclassifiable Right |
| 223 | Epilepsy | 46 | Male   | 2k | 240 | 0.1 | 500 | 60 | unclassifiable Right |
| 224 | Epilepsy | 23 | Male   | 2k | 240 | 0.1 | 500 | 60 | unclassifiable Right |
| 225 | Epilepsy | 11 | Male   | 2k | 240 | 0.1 | 500 | 60 | unclassifiable Right |
| 226 | Epilepsy | 25 | Male   | 2k | 240 | 0.1 | 500 | 60 | unclassifiable Right |
| 227 | Epilepsy | 22 | Female | 2k | 240 | 0.1 | 500 | 60 | unclassifiable Right |
| 228 | Epilepsy | 14 | Female | 2k | 240 | 0.1 | 500 | 60 | unclassifiable Right |
| 229 | Epilepsy | 20 | Male   | 2k | 240 | 0.1 | 500 | 60 | unclassifiable Right |
| 230 | Epilepsy | 27 | Male   | 1k | 240 | 0.1 | 200 | 60 | unknown              |
| 231 | Epilepsy | 18 | Female | 1k | 240 | 0.1 | 200 | 60 | unknown              |
| 232 | Epilepsy | 16 | Male   | 2k | 240 | 0.1 | 500 | 60 | unknown              |
| 233 | Epilepsy | 33 | Male   | 2k | 240 | 0.1 | 500 | 60 | unknown              |
